# Supplementary material for: F-box protein FBXO22 mediates polyubiquitination and degradation of KLF4 to promote hepatocellular carcinoma progression
Source: PubMed Central journal article supplement (PMC4673198; doi:10.18632/oncotarget.4082), 2015-05-28
Supplement: oncotarget-06-22767-s001.pdf [file oncotarget-06-22767-s001.pdf]

**SUPPLEMENTARY FIGURES**

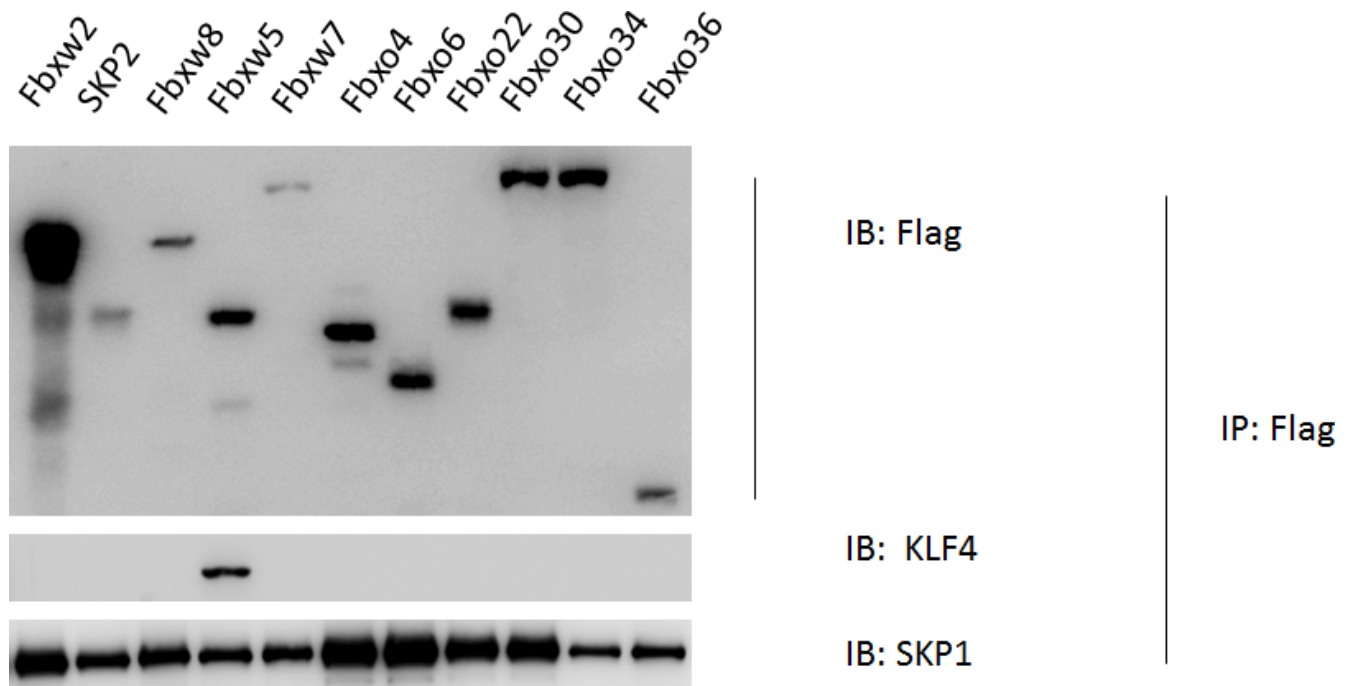

**Supplementary Figure S1: The interaction of KLF4 and F-Box protein as indicated.** HepG2 cells were transfected with adenovirus containing Flag-tagged F-Box proteins for 36 hr. Cells were harvested for immunoprecipitation with Flag-M2 beads and immunoblotted with antibodies against Flag, KLF4 and SKP1.

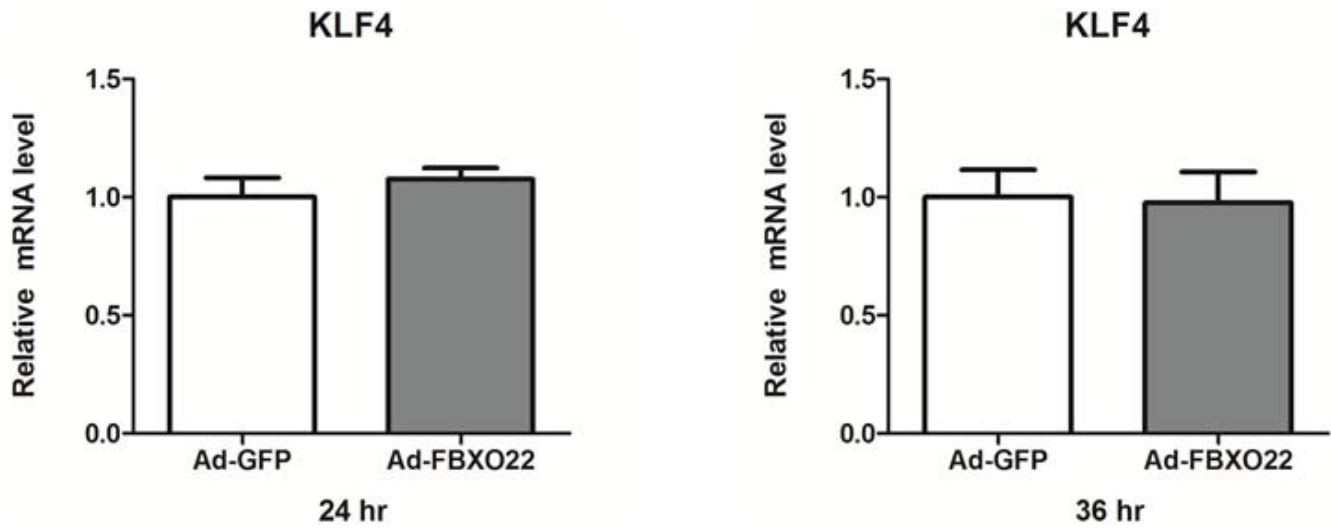

Supplementary Figure S2: Relative mRNA levels of KLF4 in HepG2 cells transfected with adenoviral shRNA targeting FBXO22 or a negative control (NC) for 24 or 36 hr.

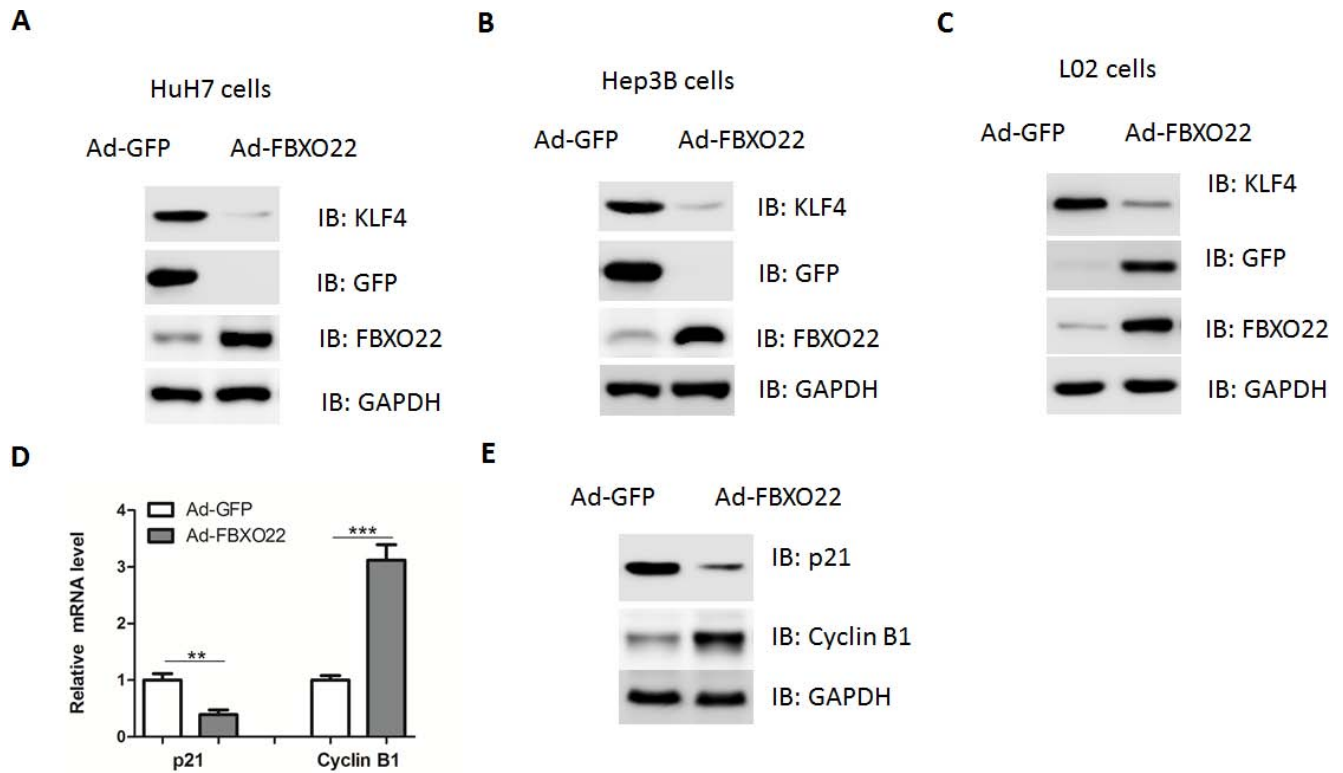

**Supplementary Figure S3: A–C. The levels of KLF4 in cell lysates were determined by Western blot.** HuH7 (A), Hep3B (B) or L02 (C) cells were transfected with adenovirus expressing GFP or FBXO22 for 36 hr. **D.** Relative mRNA levels of p21 and Cyclin B1 in HepG2 cells transfected with adenovirus expressing GFP or FBXO22 for 36 hr. **E.** Protein levels of p21 and Cyclin B1 in HepG2 cells were determined by Western blot.

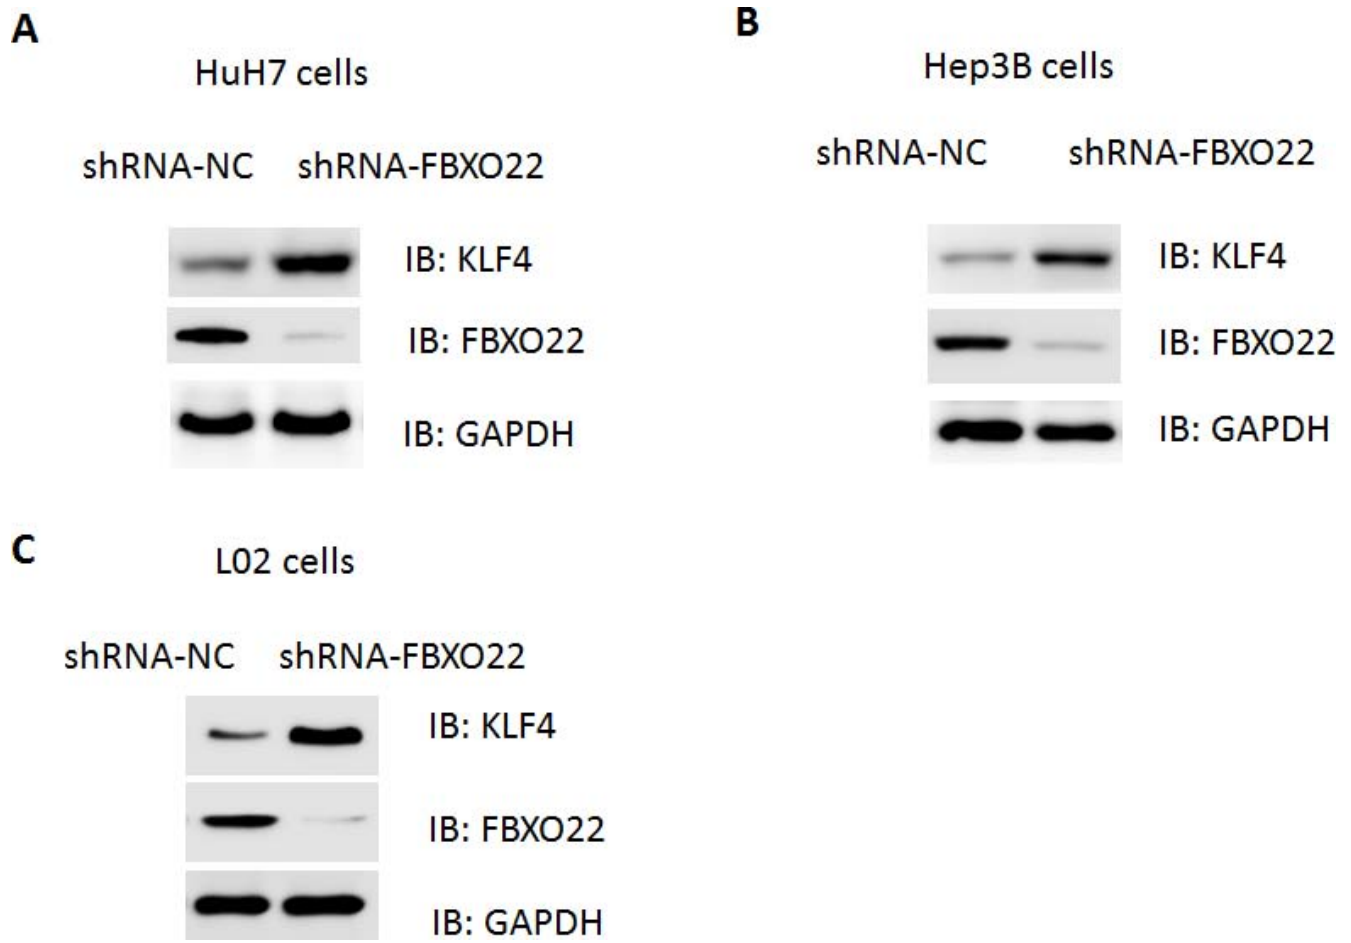

**Supplementary Figure S4: A–C. The levels of KLF4 in cell lysates were determined by Western blot.** HuH7 (A), Hep3B (B) or L02 (C) cells were transfected with adenoviral shRNA targeting FBXO22 or a negative control (NC) for 36 hr.

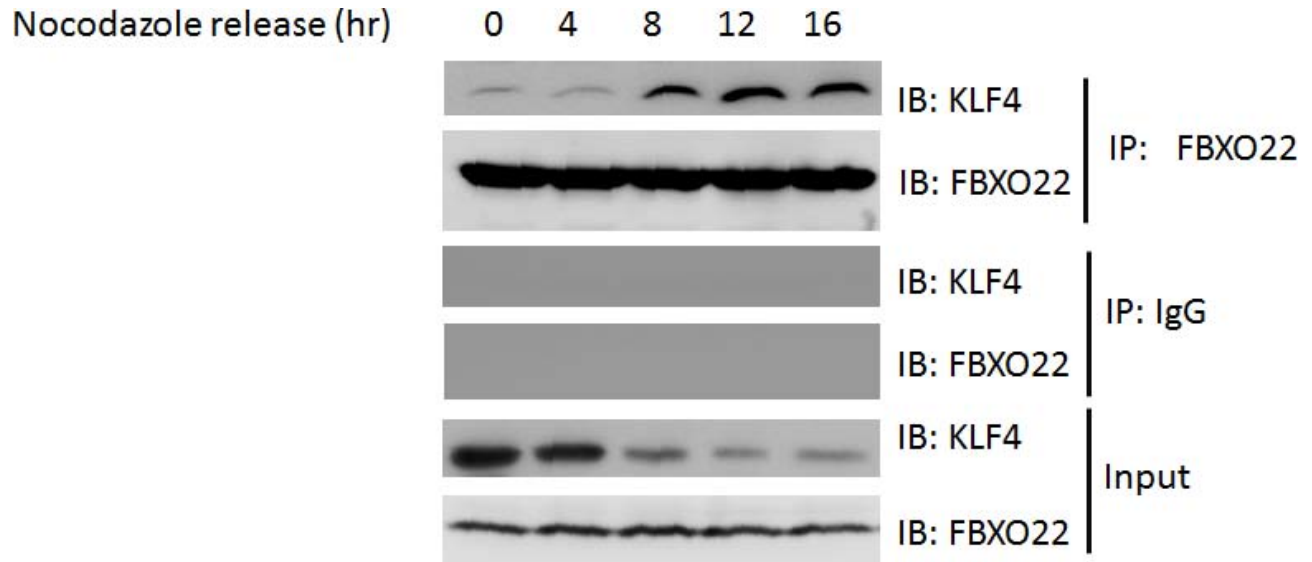

**Supplementary Figure S5: Endogenous association between FBXO22 and KLF4 in HepG2 cells was performed by co-immunoprecipitation (CO-IP) experiments.** Cells were synchronized by growth in nocodazole, and then released for the indicated periods.

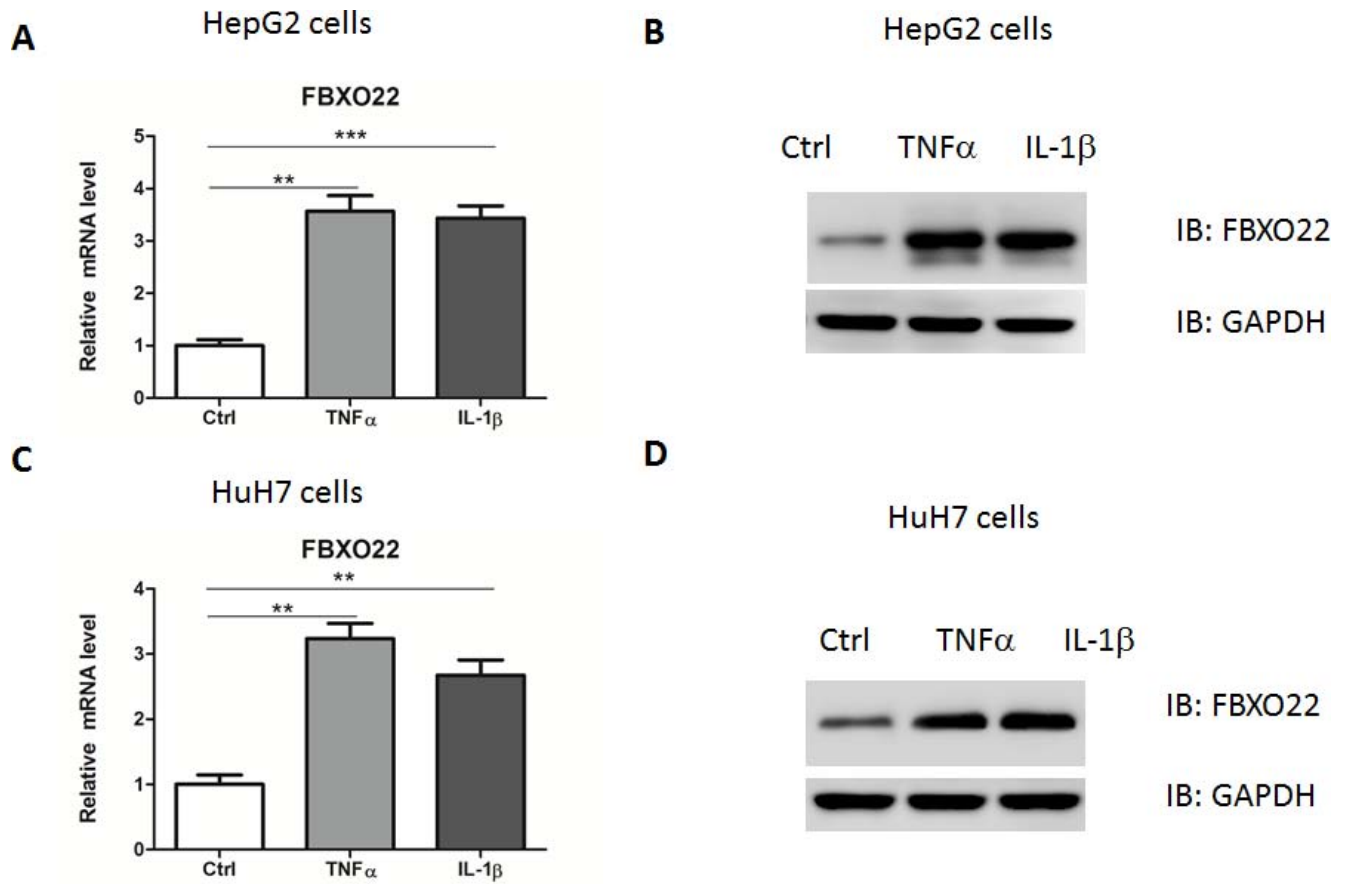

Supplementary Figure S6: A–B. mRNA (A) and protein (B) levels of FBXO22 in HepG2 cells treated with TNF $\alpha$  (10ng/ml), IL-1 $\beta$  (10ng/ml) or vehicle control for 24 and 36 hr, respectively. C–D. mRNA (C) and protein (D) levels of FBXO22 in HuH7 cells treated with TNF $\alpha$ , IL-1 $\beta$  or vehicle control for 24 and 36 hr, respectively.
